# Supplementary material for: Characterisation of the Antibiotic Profile of Lysobacter capsici AZ78, an Effective Biological Control Agent of Plant Pathogenic Microorganisms
Source: MDPI journal article supplement (doi:10.3390/microorganisms9061320), 2021-06-17
Supplement: s1 [file s1]

**A.**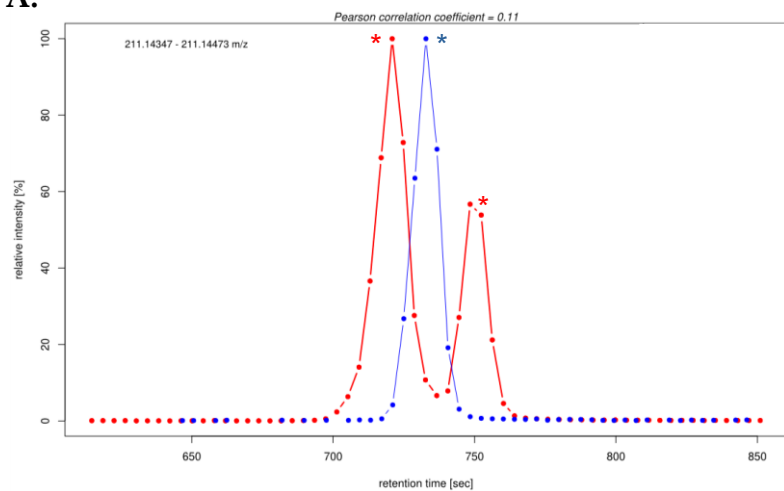**B.**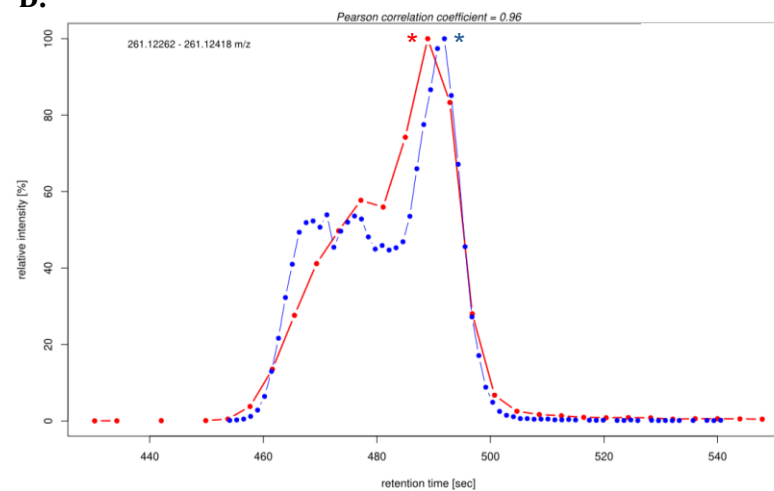**C.**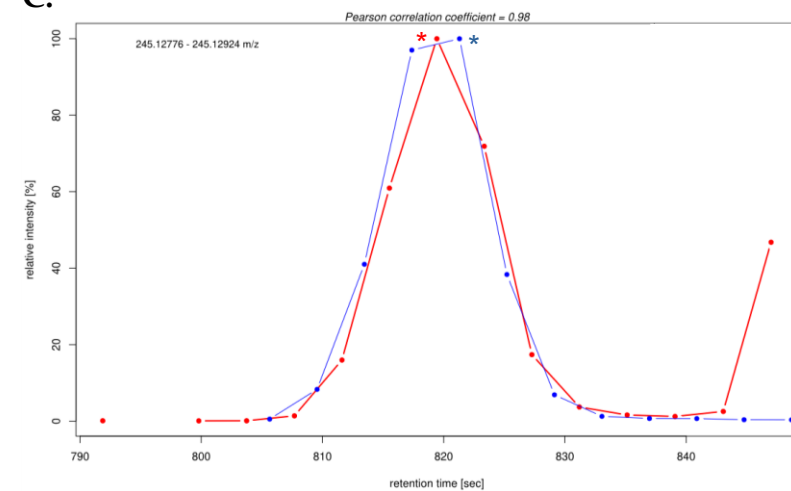**D.**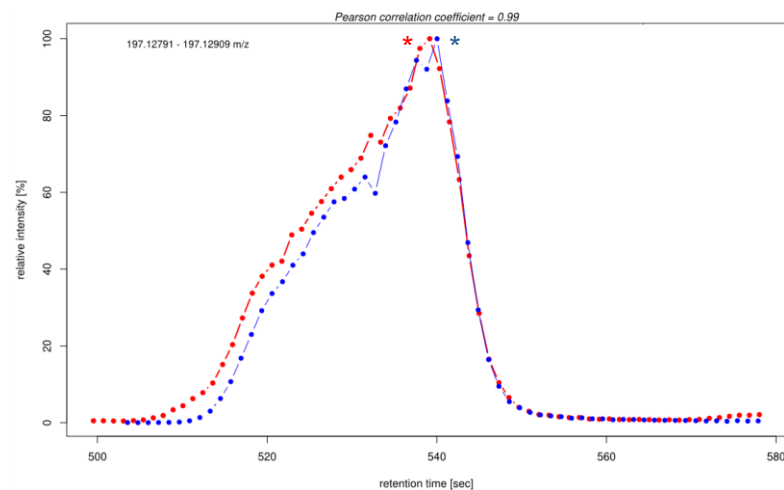**E.**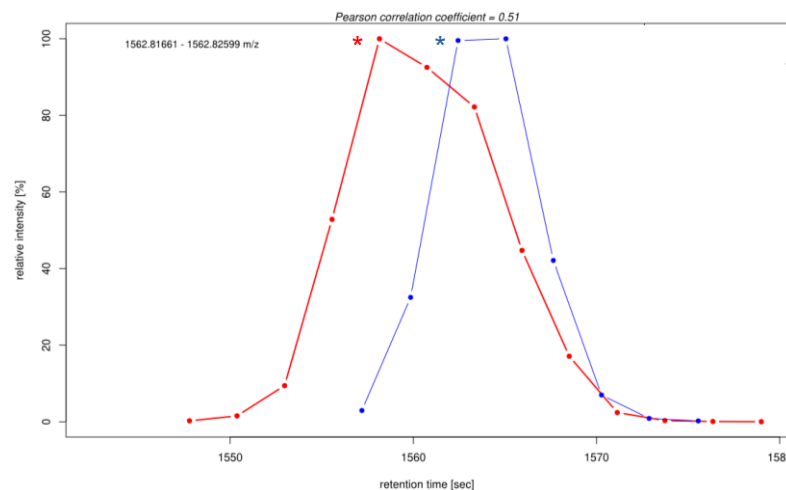**F.**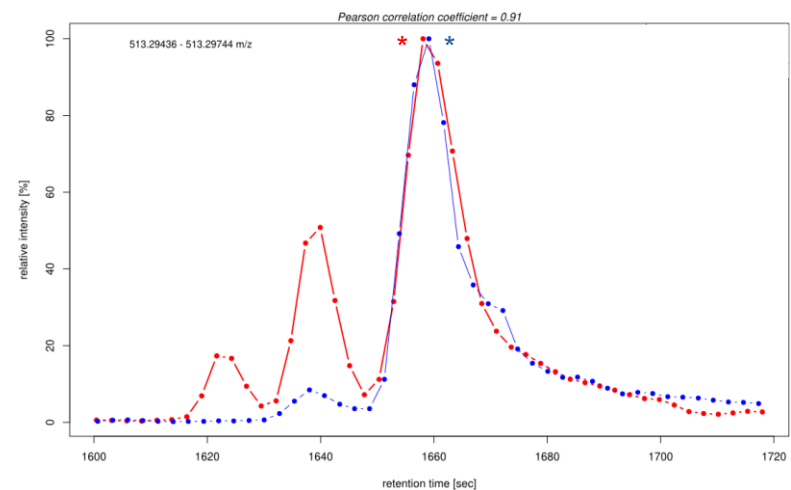

**Figure S1** Overlay of the extracted ion chromatograms of reference standards (blue) and compounds detected in AZ78 extracts (red); (A) cyclo(Pro-Leu), (B) cyclo(L-Pro-L-Tyr), (C) cyclo(Phe-Pro), (D) cyclo(Pro-Val), (E) WAP-8294A2 and (F) dihydromaltophilin; \* peaks selected for further MS/MS analysis.

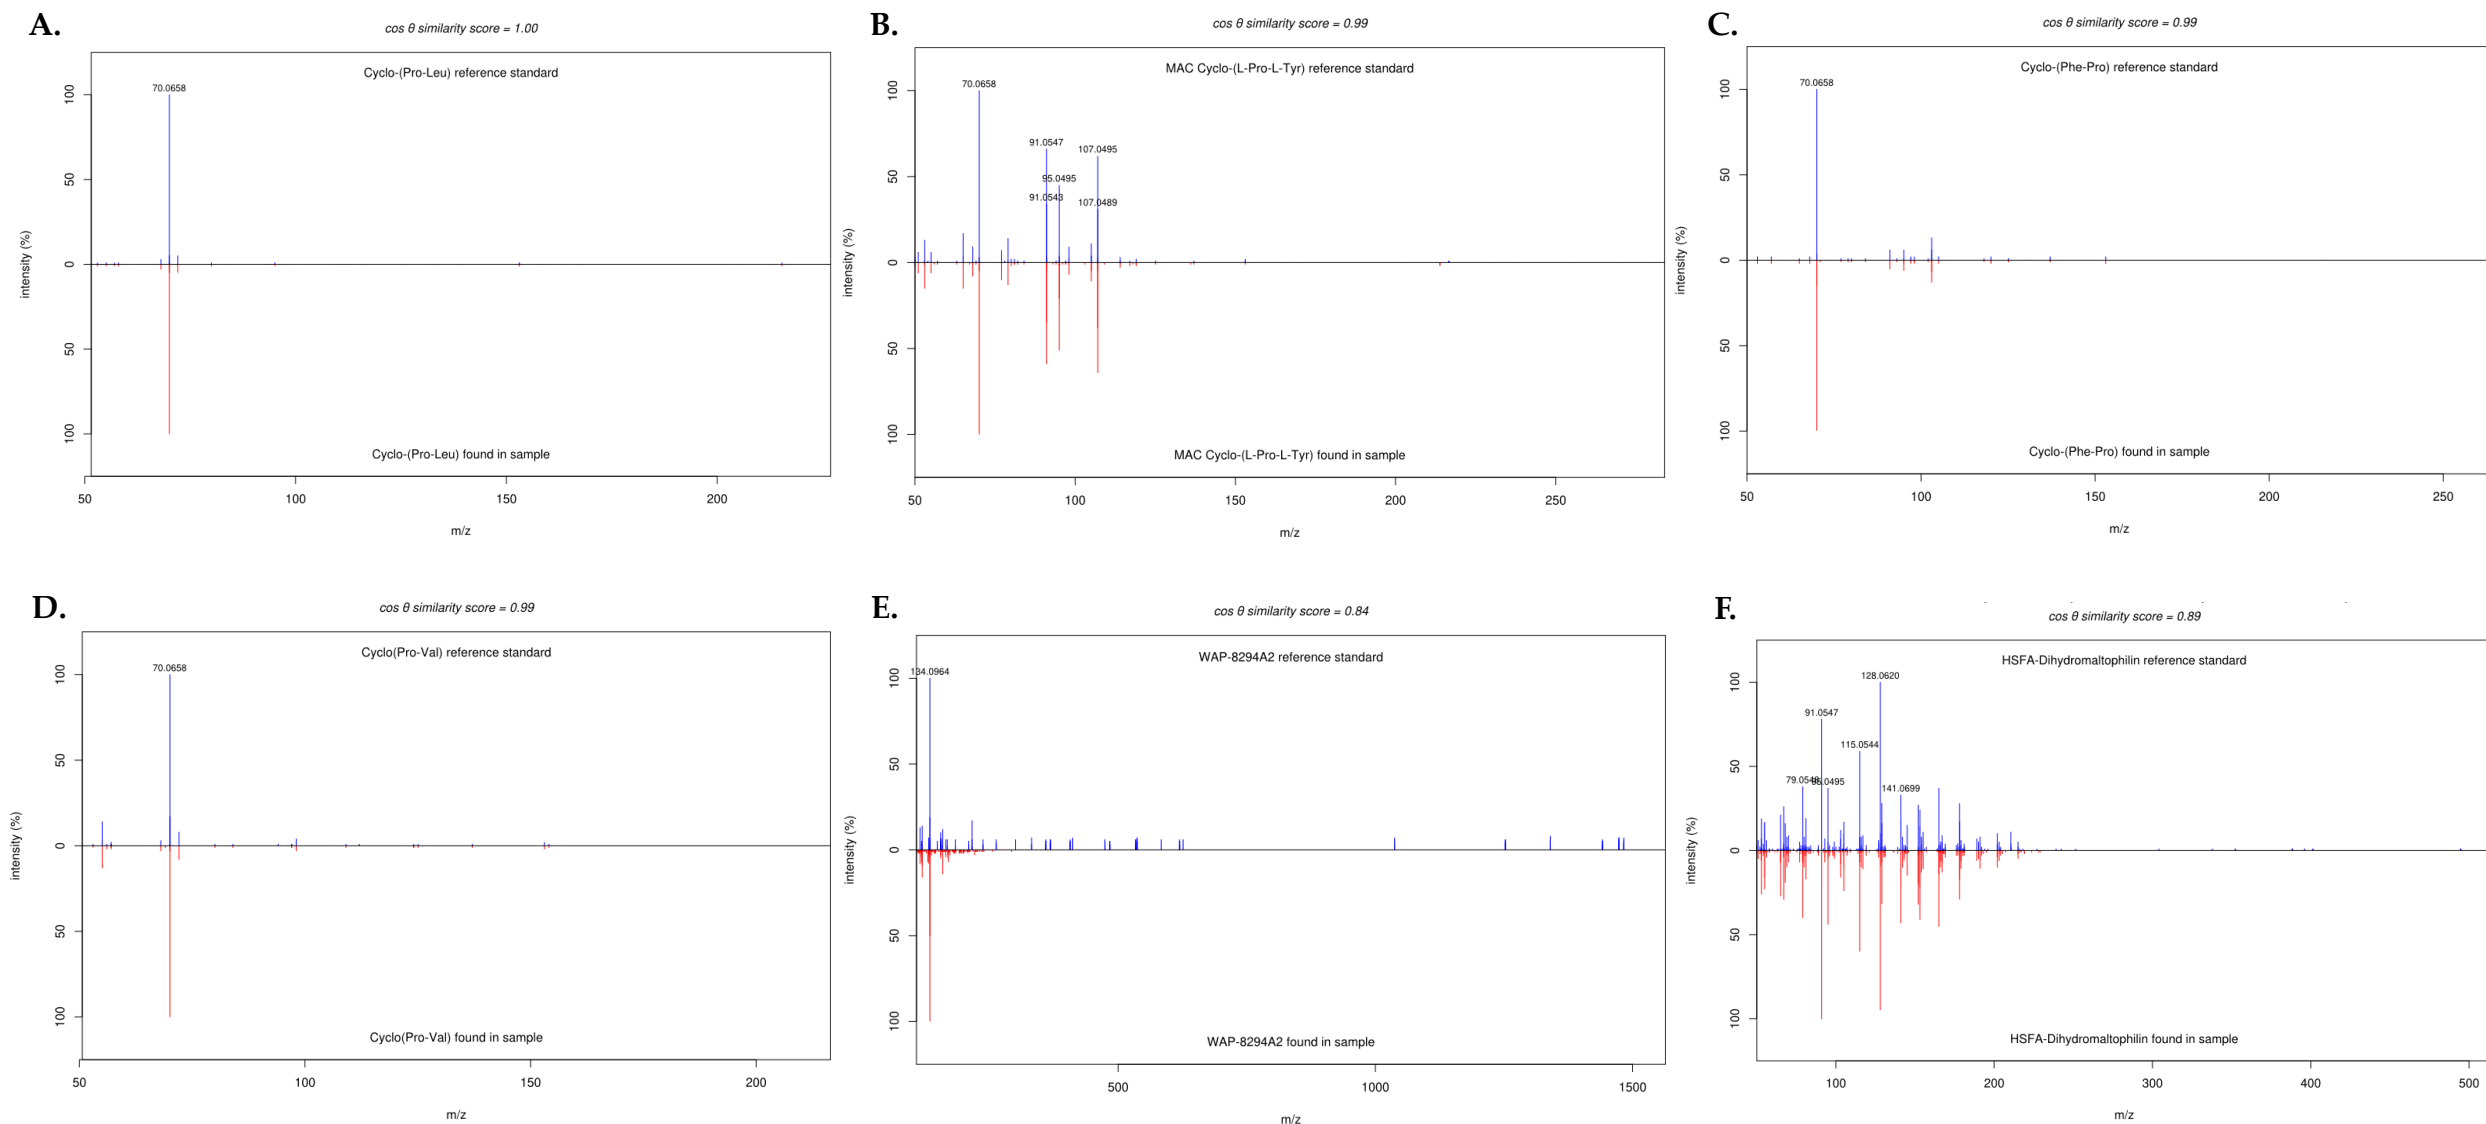

**Figure S2** Side by side comparison of LC-HRMS/MS spectra of reference standards (blue) and compounds detected in AZ78 extracts (red); (A) cyclo(Pro-Leu) at 12.0 min, (B) cyclo(L-Pro-L-Tyr), (C) cyclo(Phe-Pro), (D) cyclo(Pro-Val), (E) WAP-8294A2 and (F) dihydromaltophilin.

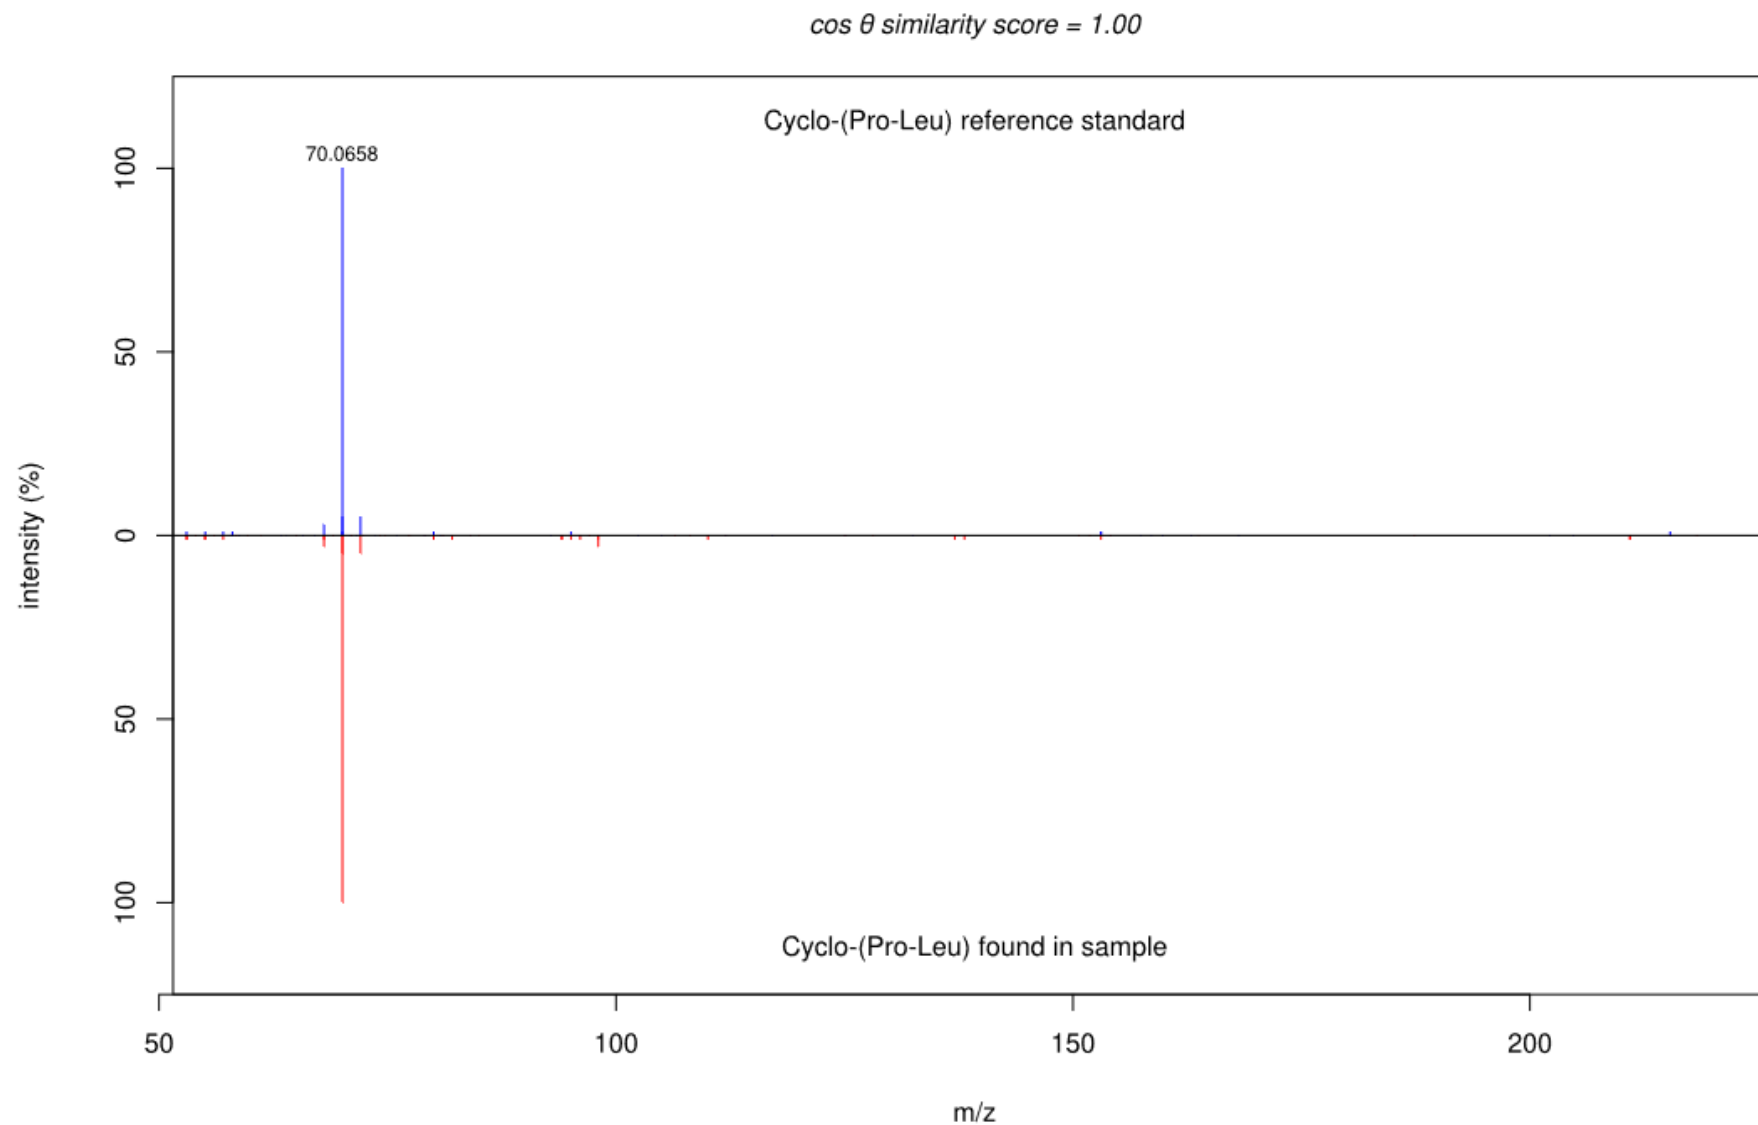

**Figure S3** Side by side comparison of LC-HRMS/MS spectra of cyclo(Pro-Leu) peak at 12.5 min (red) and reference standard (blue).
